# Supplementary material for: Innovating With People - The Business of Inclusive Design
Source: MDPI journal article supplement (doi:10.3390/ijerph191811828), 2010-05-19
Supplement: s1 [file s1]

**Table S2:** List of included policy documents \*

| Document type                          | Reference | Year | Organization | Title                                                                                                                                                                                                                                |
|----------------------------------------|-----------|------|--------------|--------------------------------------------------------------------------------------------------------------------------------------------------------------------------------------------------------------------------------------|
| <b>Global</b>                          |           |      |              |                                                                                                                                                                                                                                      |
| Report                                 | [1]       | 2004 | COAG         | FAO's Proposed Follow-up to the Report of the Joint WHO/FAO Expert Consultation on Diet, Nutrition and the Prevention of Chronic Diseases                                                                                            |
| Resolution and decisions, Annexes      | [2]       | 2004 | WHO          | Fifty-Seventh World Health Assembly. WHA57.17 Global strategy on diet, physical activity and health                                                                                                                                  |
| Resolution and decisions, Annexes      | [3]       | 2007 | WHO          | Sixtieth session, First Special session, WHA60.23 Prevention and control of noncommunicable diseases: implementation of the global strategy                                                                                          |
| Resolution and decisions, Annexes      | [3]       | 2007 | WHO          | Sixtieth session, First Special session, WHA60.24 Health Promotion in a Globalized world                                                                                                                                             |
| Report on matters arising from WHO/FAO | [4]       | 2007 | CODEX        | Codex committee on food labelling, thirty-fifth session, Ottawa, Canada, April 30 - May 4 2007                                                                                                                                       |
| Guidelines and standards               | [5]       | 2007 | CODEX        | Codex Alimentarius Food Labelling.                                                                                                                                                                                                   |
| Resolution and decisions, Annexes      | [6]       | 2008 | WHO          | Sixty-First World Health Assembly WHA61/2008/REC/1, WHA61.14 Prevention and control of noncommunicable diseases: implementation of the global strategy                                                                               |
| Resolution and decisions               | [7]       | 2010 | WHO          | Sixty-third World Health Assembly: Resolutions and decisions annexes. WHA63.14 Marketing of food and non-alcoholic beverages to children                                                                                             |
| Declaration                            | [8]       | 2011 | WHO          | First Global Ministerial Conference on Healthy Lifestyles and Noncommunicable Disease Control Moscow, 28-29 April 2011. Moscow Preamble                                                                                              |
| Report of the Secretary General        | [9]       | 2011 | UNGA         | Prevention and control of non-communicable diseases Report of the Secretary-General                                                                                                                                                  |
| Resolution                             | [10]      | 2012 | UNGA         | Resolution adopted by the General Assembly: Political Declaration of the High-level Meeting of the General Assembly on the Prevention and Control of Non-communicable Diseases, 66th session                                         |
| Matters arising from WHO/FAO           | [11]      | 2012 | CODEX        | Joint FAO/WHO Food Standards Programme Committee on Food Labelling Fortieth Session. Ottawa.                                                                                                                                         |
| Report of the Director-General         | [12]      | 2012 | UNGA         | Note by the Secretary-General transmitting the report of the Director-General of the World Health Organization on options for strengthening and facilitating multisectoral action for the prevention and control of non-communicable |

---

\* The list of included articles is for the study entitled: *Reducing Sugar Intake in South Africa: Learnings from A Multilevel Policy Analysis on Diet and Noncommunicable Disease Prevention.*

|                                   |      |      |                                         |                                                                                                                                                                                                                                             |
|-----------------------------------|------|------|-----------------------------------------|---------------------------------------------------------------------------------------------------------------------------------------------------------------------------------------------------------------------------------------------|
| Resolution and decisions, Annexes | [13] | 2012 | WHO                                     | Sixty-Fifth World Health Assembly<br>WHA65/2012/REC/1., WHA65(8) Prevention and control of noncommunicable diseases: follow-up to the High-level Meeting of the General Assembly on the Prevention and Control of Non-communicable Diseases |
| Guidelines                        | [14] | 2013 | CODEX                                   | Guidelines for the Use of Nutrition and Health Claims (CAC/GL 23-1997)                                                                                                                                                                      |
| Report of the Director-General    |      | 2013 | UNGA                                    | Prevention and control of NCDs, A68/650                                                                                                                                                                                                     |
| Resolution and decisions, Annexes | [15] | 2013 | WHO                                     | Sixty-Sixth World Health Assembly<br>WHA66/2013/REC/1, WHA66.8 Follow-up to the Political Declaration of the High-level Meeting of the General Assembly on the Prevention and Control of NCDs                                               |
| Report of the Director-General    | [16] | 2013 | WHO                                     | Note by the Secretary-General transmitting the report of the Director-General of the World Health Organization on the prevention and control of non-communicable diseases A/68/650.                                                         |
| Declaration                       | [17] | 2014 | FAO                                     | Conference Outcome Document: Rome Declaration on Nutrition. Second International Conference on Nutrition                                                                                                                                    |
| Strategies and plans              | [18] | 2014 | FAO                                     | Conference Outcome Document: Framework. Second International Conference on Nutrition.                                                                                                                                                       |
| Guideline                         | [19] | 2015 | WHO                                     | Guideline: Sugars intake for adults and children                                                                                                                                                                                            |
| Report of the Director General    | [20] | 2017 | UN Economic and Social Council (ECOSOC) | United Nations Inter-Agency Task Force on the Prevention and Control of Non-communicable Diseases E/2017/54.                                                                                                                                |
| Resolution and decisions, Annexes | [21] | 2017 | WHO                                     | Seventieth World Health Assembly<br>WHA70/2017/REC/1, WHA70(19) Report of the Commission on Ending Childhood Obesity                                                                                                                        |
| Guidelines and standards          | [22] | 2017 | CODEX                                   | Codex Guidelines on Nutrition Labelling Revised                                                                                                                                                                                             |
| Resolution and decisions, Annexes | [23] | 2018 | WHO                                     | Seventy-First World Health Assembly<br>WHA71/2018/REC/1, WHA71.2 Preparation for the third High-level Meeting of the General Assembly on the Prevention and Control of Non-communicable Diseases, to be held in 2018                        |
| Resolution                        | [24] | 2018 | UNGA                                    | Political declaration of the third high-level meeting of the General Assembly on the prevention and control of non-communicable diseases A/RES/73/2                                                                                         |
| Report of the Director General    | [25] | 2019 | UN Economic and Social Council (ECOSOC) | United Nations Inter-Agency Task Force on the Prevention and Control of Non-communicable Diseases E/2017/54.                                                                                                                                |
| Report of the Director General    | [26] | 2019 | WHO                                     | Outcome of the Second International Conference on Nutrition: Report by the Director-General A72/58.                                                                                                                                         |
| Guidelines                        | [27] | 2020 | South African Revenue Services          | Excise External Policy. Health Promotion Levy on Sugary Beverages                                                                                                                                                                           |
| <b>Africa region</b>              |      |      |                                         |                                                                                                                                                                                                                                             |
| Strategies and plans              | [28] | 2012 | WHO                                     | Oral health in the WHO African Region: A regional strategy (1999–2008) in Compendium of Health Strategies                                                                                                                                   |
| Strategies and plans              | [29] | 2016 | WHO                                     | Regional Oral Health Strategy 2016-2025: Addressing Oral diseases as Part of Non-communicable Diseases                                                                                                                                      |

|                           |      |      |                                   |                                                                                                                                                     |
|---------------------------|------|------|-----------------------------------|-----------------------------------------------------------------------------------------------------------------------------------------------------|
| Report of the Secretariat | [30] | 2018 | WHO                               | Status of the Implementation of the Four Time-bound Commitments of NCDs                                                                             |
| <b>South Africa</b>       |      |      |                                   |                                                                                                                                                     |
| Guidelines                | [31] | 2007 | Department of Health              | Draft Guidelines relating to regulations governing the labelling and advertising of foods                                                           |
| Regulations               | [32] | 2010 | Department of Health              | Foodstuffs, Cosmetics and Disinfectants Act, 1972: Regulations relating to the labelling and advertising of Foods                                   |
| Strategies and plans      | [33] | 2010 | National Planning Commission      | Our future – make it work. National Development Plan 2030                                                                                           |
| Declaration               | [34] | 2011 | Department of Health              | South African Declaration on the Prevention and Control of NCDs                                                                                     |
| Strategies and plans      | [35] | 2012 | Department of Health              | Strategic plan for the prevention and control of non-communicable diseases 2013–17.                                                                 |
| Guidelines                | [36] | 2013 | Department of Health              | Food-Based Dietary Guidelines for South Africa.                                                                                                     |
| Guideline and standards   | [37] | 2014 | Department of Basic Education     | Food Specifications – for products marketed to the National School Nutrition Programme                                                              |
| Guidelines                | [38] | 2014 | Department of Basic Education     | National School Nutrition Programme Guidelines for Tuck Shop Operators.                                                                             |
| Regulations               | [39] | 2014 | Department of Health              | Foodstuffs, Cosmetics and Disinfectants Act, 1972 (Act 54 of 1972): Regulations relating to the labelling and advertising of foodstuffs: amendment. |
| Guide                     | [40] | 2016 | Department of Health              | National guide for healthy meal provisioning in the workplace.                                                                                      |
| Strategies and plans      | [41] | 2016 | Department of Health              | Strategy for the prevention and control of obesity in South Africa 2015–2020                                                                        |
| Strategies and plans      | [42] | 2017 | National Department of Planning   | National Food and Nutrition Security Plan 2018-2023                                                                                                 |
| Act                       | [43] | 2017 | National Treasury                 | Rates and Monetary Amounts and Amendment of Revenue Laws Bill 26 of 2017                                                                            |
| Strategies and plans      | [44] | 2020 | Department of Trade and Industry  | South African Sugarcane Value Chain Master Plan to 2030                                                                                             |
| Guideline and standards   | [45] | 2020 | Revenue Services (SARS)           | Excise External Policy Health Promotion Levy on Sugary Beverages                                                                                    |
| <b>Western Cape</b>       |      |      |                                   |                                                                                                                                                     |
| Strategies and plans      | [46] | 2014 | Western Cape Government Health    | Healthcare 2030.                                                                                                                                    |
| Strategies and plans      | [47] | 2016 | Western Cape Government Health    | Household Food and Nutrition Security Strategic Framework.                                                                                          |
| Guide                     | [48] | 2020 | Western Cape Government Education | Healthy Eating Guide                                                                                                                                |

## References

1. Food and Agriculture Organization. FAO's Proposed Follow-up to the Report of the Joint WHO/FAO Expert Consultation on Diet, Nutrition and the Prevention of Chronic Diseases COAG/2004/3. 2004.
2. World Health Organization. Fifty-Seventh World Health Assembly WHA57/2004/REC/1. 2004.
3. World Health Organization. World Health Assembly First Special Session. Geneva2007.
4. Codex Alimentarius Commission. Joint FAO/WHO Food Standards Programme Codex Committee on Food Labelling Thirtieth-Fifth Session CX/FL 07/35/3. 2007.
5. World Health Organization and Food and Agriculture Organization. Codex Alimentarius Food Labelling. 2007.
6. World Health Organization. Sixty-First World Health Assembly WHA61/2008/REC/1. Geneva2008.
7. World Health Organization. Sixty-Third World Health Assembly WHA63/2010/REC/1. Geneva2010.
8. World Health Organization. First Global Ministerial Conference on Healthy Lifestyles and Noncommunicable Disease Control. World Health Organization; 2011.
9. United Nations General Assembly. Prevention and control of non-communicable disease: Report of the Secretary-General. 2011.
10. United Nations General Assembly. Political Declaration of the High-level Meeting of the General Assembly on the Prevention and Control of Non-communicable Diseases A/RES/66/2. 2012.
11. Codex Alimentarius Commission. Joint FAO/WHO Food Standards Programme Committee on Food Labelling Fortieth Session. Ottawa2012.
12. United Nations General Assembly. Note by the Secretary-General transmitting the report of the Director-General of the World Health Organization on options for strengthening and facilitating multisectoral action for the prevention and control of non-communicable diseases through effective partnership. 2012.
13. World Health Organization. Sixty-Fifth World Health Assembly WHA65/2012/REC/1. Geneva2012.
14. Codex Alimentarius Commission. Guidelines for the Use of Nutrition and Health Claims (CAC/GL 23-1997). 2013.
15. World Health Organization. Sixty-Sixth World Health Assembly WHA66/2013/REC/1. Geneva2013.
16. United Nations General Assembly. Note by the Secretary-General transmitting the report of the Director-General of the World Health Organization on the prevention and control of non-communicable diseases A/68/650. 2013.
17. Food and Agriculture Organization and World Health Organization. Conference Outcome Document: Framework. Second International Conference on Nutrition. Rome2014.
18. Food and Agriculture Organization of the United Nations (FAO) and World Health Organization (WHO), editor Conference outcome document: Rome declaration on nutrition. Second international conference on nutrition Rome: FAO and WHO; 2014.
19. World Health Organization. Guideline: Sugar intake for adults and children. 2015.
20. United Nations Economic and Social Council. United Nations Inter-Agency Task Force on the Prevention and Control of Non-communicable Diseases E/2017/54. 2017.
21. World Health Organization. Seventieth World Health Assembly WHA70/2017/REC/1. Geneva2017.
22. Codex Alimentarius Commission. Guidelines on Nutrition Labeling CAC/GL 2-1985. 2017.
23. World Health Organization. Seventy-First World Health Assembly WHA71/2018/REC/1. Geneva2018.
24. Political declaration of the high-level meeting of the general assembly on the prevention and control of non-communicable diseases. A/RES/73/2, (2018).
25. United Nations Economic and Social Council. United Nations Inter-Agency Task Force on the Prevention and Control of Non-communicable Diseases E/2019/55. 2019.
26. World Health Organization. Outcome of the Second International Conference on Nutrition: Report by the Director-General A72/58. Geneva2019.
27. South African Revenue Services (SARS). Excise External Policy Health Promotion Levy on Sugary Beverages. 2020.
28. World Health Organization Africa. Compendium of Public Health Strategies 2012.
29. World Health Organization Africa. Regional Oral Health Strategy 2016-2025: Addressing Oral diseases as Part of Non-communicable Diseases. In: Africa RCF, editor. Ethiopia2016.
30. World Health Organization Regional Office for Africa. Status of Implementation of the Four Time-bound Commitments of NCDs. Republic of Senegal; 2018.
31. South Africa Department of Health. Draft guidelines regulations governing the labelling and advertising of foodstuffs, R642 of 20 July 2007. 2007.
32. South Africa Department of Health. Foodstuffs, Cosmetics and Disinfectants Act, 1972 (Act 54 of 1972) regulations relating to the labelling and advertising of foodstuffs (R. 146). 2010.
33. National Planning Commission. Our future – make it work. National Development Plan 2030. 2010.
34. South Africa Department of Health. South African Declaration on the prevention and control of diseases. 2011.
35. South Africa Department of Health. Strategic plan for the prevention and control of non-communicable diseases 2013–17. 2012.
36. Vorster HH BJ, Venter CS;. Food-Based Dietary Guidelines for South Africa. South African Journal of Clinical Nutrition. 2013;26(3).
37. South Africa Department of Basic Education. Food Specifications – for products marketed to the National School Nutrition Programme 2014.

38. South Africa Department of Basic Education. National School Nutrition Programme Guidelines for Tuck Shop Operators. 2014.
39. South Africa Department of Health. Foodstuffs, Cosmetics and Disinfectants Act, 1972 (Act 54 of 1972) regulations relating to the labelling and advertising of foodstuffs: amendment. 2014.
40. South Africa Department of Health. National guide for healthy meal provisioning in the workplace. Pretoria; 2016.
41. South Africa Department of Health. Strategy for the prevention and control of obesity in South Africa 2015–2020. 2016.
42. South Africa Coordination Committee and Department of Planning; Monitoring and Evaluation (DPME). National Food and Nutrition Security Plan 2018-2023. 2017.
43. South African National Treasury and Revenue Services (SARS). Final Response Document on the 2017 Rates and Monetary Amounts and Amendment fo Revenue Laws Bill – Health Promotion Levy, 2017. 2017.
44. South Africa Department of Trade and Industry. South African Sugarcane Value Chain Master Plan to 2030. 2020.
45. South African Revenue Services (SARS). Excise External Policy Health Promotion Levy on Sugary Beverages. 2020.
46. Western Cape Government. Healthcare 2030. 2014.
47. Western Cape Government. Household Food and Nutrition Security Strategic Framework. 2016.
48. Western Cape Government Education. Healthy Eating Guide. 2020.
