# Supplementary material for: Innovating With People - The Business of Inclusive Design
Source: MDPI journal article supplement (doi:10.3390/ijerph191811828), 2010-05-19
Supplement: s1 [file s1]

Figure S1: Policy transfer framework adapted from Dolowitz and Marsh (1996 and 2000)

| Why transfer?                        |                                                                   |                   |                                                      |                                                                                                                        |                                                                                |                    |                                                                                                                |                                                                                                           |                                                                                                                |
|--------------------------------------|-------------------------------------------------------------------|-------------------|------------------------------------------------------|------------------------------------------------------------------------------------------------------------------------|--------------------------------------------------------------------------------|--------------------|----------------------------------------------------------------------------------------------------------------|-----------------------------------------------------------------------------------------------------------|----------------------------------------------------------------------------------------------------------------|
| Want to...                           | Have to..                                                         |                   | Who is involved in transfer?                         | What is transferred?                                                                                                   | From where?                                                                    | Degree of transfer | Constraints on transfer                                                                                        | How to demonstrate policy transfer                                                                        | How transfer leads to policy failure                                                                           |
| Voluntary                            | Mixtures                                                          | Coercive          |                                                      |                                                                                                                        | Multilevel                                                                     |                    |                                                                                                                |                                                                                                           |                                                                                                                |
| Lesson drawing (perfet rational-ity) | Lesson drawing (bounded rationality)                              | Direct imposition | Elected officials                                    | Policies                                                                                                               | Global                                                                         | Copying            | Policy compexity                                                                                               | Reports (Commissioned/ Uncommissioned)                                                                    | *Uniformed                                                                                                     |
|                                      | International pressures (Image) (Consensus) (Perceptions)         |                   | Bureaucrats/Civil servants                           | Ideologies                                                                                                             | Regional                                                                       | Emulation          | Past policies                                                                                                  | Conferences                                                                                               | *Incomplete                                                                                                    |
|                                      | Externalities                                                     |                   | Consultants/ think tanks/ transnational corporations | Attitudes/cultural values                                                                                              | *National                                                                      | Mixtures           | Structural/ institutional feasibility (ideology) (cultural) (proximity) (technology) (economic) (bureaucratic) | Meetings/visits                                                                                           | *Innappropriate                                                                                                |
|                                      | Conditionality (Loans) (Conditions attached to business activity) |                   | Supranational institutions                           | *Programmes                                                                                                            | *Subnational                                                                   | Inspiration        | Language                                                                                                       | *Better practices/ online sharing platforms                                                               |                                                                                                                |
|                                      | Obligations                                                       |                   |                                                      | *Negative lessons                                                                                                      |                                                                                |                    |                                                                                                                | *Frameworks                                                                                               |                                                                                                                |
| Adaptation of the model              |                                                                   |                   |                                                      | Some aspects were not considered in detail (*) due to the focus of the review on policy directives and recommendations | The framework has been simplified. This includes transfer within-in-nation (*) |                    |                                                                                                                | Mechanisms for sharing policy learnings identified (*) and added while the category for media was omitted | Due to type of policy documents and research question focus this category was not included in the analysis (*) |
